# Supplementary material for: Integrative analysis reveals multiple modes of LXR transcriptional regulation in liver
Source: PubMed Central journal article supplement (PMC8851562; doi:10.1073/pnas.2122683119), 2022-02-10
Supplement: pnas.2122683119.sapp.pdf [file pnas.2122683119.sapp.pdf]

## **Supplemental Figure Legends**

### **SI Appendix Figure S1: Transcriptional changes in LXR-deficient liver.**

A. Differential expression analysis of the LXRDKO liver RNA-Seq results showed 246 upregulated and 321 downregulated genes. B. Volcano plot showing differential gene expression between WT and LXRDKO samples. Genes are color-coded based on their fold change and adjusted p value. C. Top 10 downregulated (left) and upregulated (right) genes from LXRDKO liver RNA-Seq based on adjusted p value.

### **SI Appendix Figure S2: Expression profiles of LXRDKO livers.**

A. Pathway enrichment results for downregulated (top) and upregulated (bottom) genes in LXRDKO liver. B. Transcription Factor ChIP-Seq enrichment analysis (ChEA) for downregulated genes in LXRDKO liver. Publicly available ChIP-Seq data were used to estimate enrichment of transcription factor binding in the promoters of genes downregulated in LXRDKO liver.

### **SI Appendix Figure S3: Chromatin accessibility profiles of LXRDKO livers**

A. Correlation heatmap of ATAC-Seq samples using all peaks. B. t-SNE plot of ATAC-Seq samples. C. Distribution of top 1000 peaks with largest loss and gain in LXRDKO liver based on relative distance to closest TSS. D. Average change in accessibility of peaks associated with differentially expressed genes in LXRDKO liver. E. Average change in accessibility in intronic (left), intergenic (right), and promoter (bottom) regions for all genes (All) and those whose expression was reduced (Down) or increased (Up) in LXRDKO livers. \* comparison to all genes; # comparison between downregulated and upregulated genes.

### **SI Appendix Figure S4: Pathway enrichment.**

Pathway enrichment analysis of the top 1000 peaks that lost (top) and gained (bottom) accessibility.

### **SI Appendix Figure S5: Changes to LXR binding sites in LXRDKO livers.**

A. Proportion of LXR basal or agonist induced binding genes among genes differentially expressed in LXRDKO livers. B. Average number of (basal) LXR binding sites per gene for all LXR target genes and genes that are differentially expressed in LXRDKO liver. C. Changes in accessibility across LXR binding sites in LXRDKO liver compared to WT. D. Proportion of LXR binding sites within intergenic, intronic and promoter regions plotted as a function of the change in accessibility in LXRDKO liver.

### **SI Appendix Figure S6: Loss of LXRs reduces motif accessibility of other transcription factors.**

A. Heatmaps of motif enrichment of selected transcription factors from Figure 4A across binned intergenic, intronic and promoter ATAC-Seq peaks based on the change in accessibility. B. ATAC-Seq signal intensity heatmap and profile across peaks with PPARE motif, among the top 1000 peaks losing accessibility in LXRDKO livers. C. (Left) Hierarchical clustering heatmap for

transcription factor motif co-occurrence among the least accessible 10 bins from Figure 4A. Each column represents a peak and red indicates presence of the corresponding motif in that peak. (Right) Hierarchical clustering heatmap for transcription factor motif co-occurrence among LXR binding genes that are associated with the least accessible 10 bins in LXRDKO livers. Each column represents a gene and red indicates presence of the corresponding motif in the peaks associated with the same gene. D. Normalized counts for the expression of transcription factors identified in Figure 4A. (\* is used to indicate the  $FDR < 0.05$ )

**SI Appendix Figure S7: Impact of the loss of LXR on other transcription factor motif activity.**

Footprint profile of HNF6 (A) and HNF1B (B) using the ATAC-Seq samples for LXRDKO and WT with merged replicates. C. Pathway enrichment analysis of genes associated with increased accessibility of the NFY motif (top 10 bin from Figure 5A). D. Volcano plot of the expression profile of genes with NFY motif containing peaks within the top 10 bins that gain accessibility (from Figure 5A).

**SI Appendix Figure S8: Change in accessibility and genomic features at the LXR binding sites in relation to different modes of LXR action.**

A. Proportions of genomic annotations for LXR binding peaks that are associated with genes that are differentially upregulated or downregulated in LXRDKO and either downregulated, upregulated or not changing in response to either GW3965 and T0901317 treatment are plotted. B. Pathway enrichment analysis of genes that were downregulated in LXRDKO and have an LXR ChIP-Seq peak but did not change in expression in response to agonist treatment. C. LXR ChIP-Seq (basal) sites are segregated based on their genomic feature and ranked and binned based on their change in accessibility in LXRDKO livers. Motif analysis was performed for each of the bins across the accessibility and genomic features. Similar motifs were combined ( $> .90$  Similarity) and motif with low enrichment were not displayed. Transcription factor motifs enriched in the LXR binding intergenic (left), intron (middle) and promoter (right) regions are displayed. D. Signal intensity heatmap and profiles of ATAC peaks at LXR binding sites proximal to ligand-dependent repressed genes.

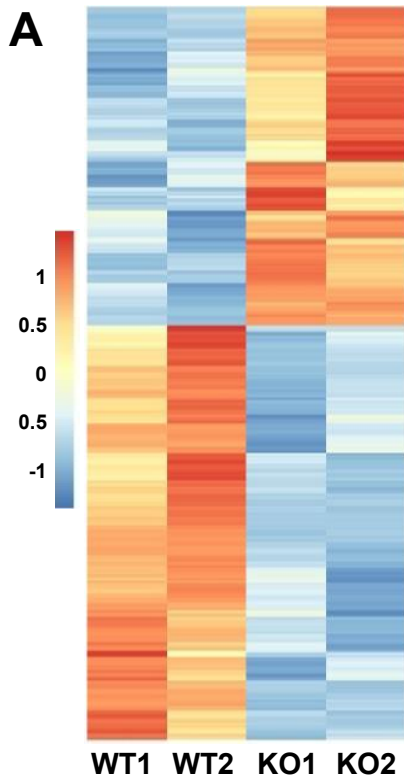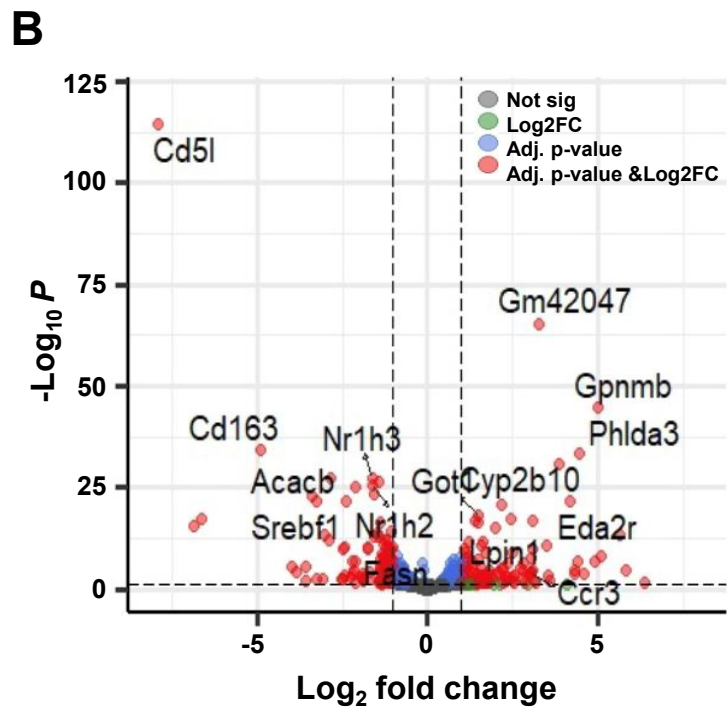

**C** Top 10 Downregulated Genes

| Name          | Adj. p value | Fold Change | Type           |
|---------------|--------------|-------------|----------------|
| Cd5l          | 2.05E-115    | 0.0040      | protein coding |
| Cd163         | 4.39E-35     | 0.0335      | protein coding |
| Clec4f        | 3.45E-28     | 0.1402      | protein coding |
| Nr1h3         | 3.45E-28     | 0.3239      | protein coding |
| Ces1e         | 2.66E-27     | 0.3733      | protein coding |
| Nr1h2         | 3.87E-26     | 0.3219      | protein coding |
| Acacb         | 5.26E-26     | 0.2306      | protein coding |
| 1810008l18Rik | 3.91E-24     | 0.3331      | lincRNA        |
| Hamp2         | 9.02E-24     | 0.0939      | protein coding |
| Srebf1        | 1.84E-22     | 0.1875      | protein coding |

Top 10 Upregulated Genes

| Name    | Adj. p value | Fold Change | Type           |
|---------|--------------|-------------|----------------|
| Gm42047 | 4.36E-66     | 9.6148      | lincRNA        |
| Gpnmb   | 1.44E-45     | 32.1408     | protein coding |
| Phlda3  | 3.49E-34     | 21.7534     | protein coding |
| Sult2a7 | 1.15E-31     | 14.4144     | protein coding |
| Eda2r   | 2.66E-22     | 18.0955     | protein coding |
| Cyp2b10 | 2.70E-21     | 4.4866      | protein coding |
| Got1    | 1.20E-18     | 2.8311      | protein coding |
| Cplane1 | 4.55E-18     | 5.3950      | protein coding |
| Gm48199 | 9.53E-18     | 8.6393      | lincRNA        |
| Fkbp5   | 9.54E-18     | 2.6513      | protein coding |

**A**

| Downregulated Pathwaysz                                 | Adjusted p-value | Genes                                                                                                                                                                                                     |
|---------------------------------------------------------|------------------|-----------------------------------------------------------------------------------------------------------------------------------------------------------------------------------------------------------|
| PPAR signaling pathway                                  | 3.92E-08         | <i>AcsI5, Lpl, Nr1h3, Dbi, Sorbs1, Fabp1, Fads2, Fabp2, Fabp5, Acox1, Me1, Cd36, Ppara</i>                                                                                                                |
| Lipid and lipoprotein metabolism                        | 2.11E-06         | <i>Slc44a1, Mttp, Lpl, Sgms2, Acacb, Acaca, Mtm1, Helz2, Fads2, Me1, Cd36, Arsa, Srebf1, Stard4, Hsd3b2, Elovl5, Srd5a1, Slc10a2, Elovl2, AcsI5, Fabp1, Gpam, Acox1, Fasn, Lpcat3, Ppara, MglI, Abcg1</i> |
| Fatty acid, triacylglycerol, and ketone body metabolism | 1.70E-04         | <i>Srebf1, Elovl5, Elovl2, AcsI5, Acacb, Acaca, Helz2, Fabp1, Gpam, Acox1, Fasn, Me1, Cd36, Ppara</i>                                                                                                     |

  

| Upregulated Pathways                       | Adjusted P-value | Genes                                                                   |
|--------------------------------------------|------------------|-------------------------------------------------------------------------|
| Cysteine and methionine metabolism         | 0.001861         | <i>Sds, Got1, Tat, Cth, Mat1a, Cdo1</i>                                 |
| p53 activity regulation                    | 0.004402         | <i>Cdkn1a, Zmat3, Igfbp3, Sesn2, Ccng1, Mdm2, Tnfrsf10b, Bax, Gtse1</i> |
| MicroRNA regulation of DNA damage response | 0.004582         | <i>Cdkn1a, Myc, Ccng1, Mdm2, Tnfrsf10b, Bax, Brca1</i>                  |

**B**

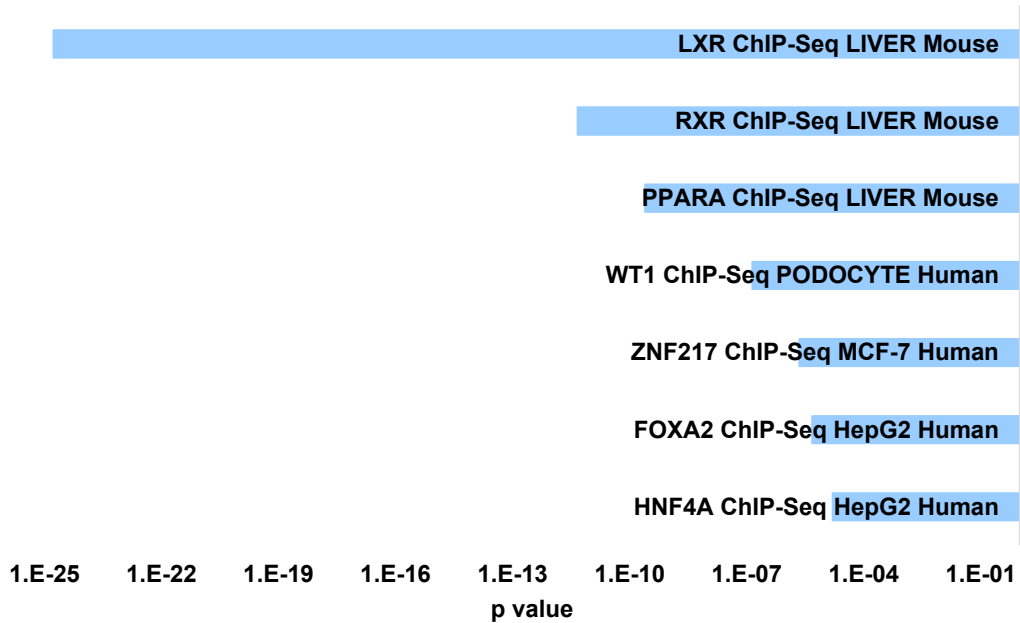

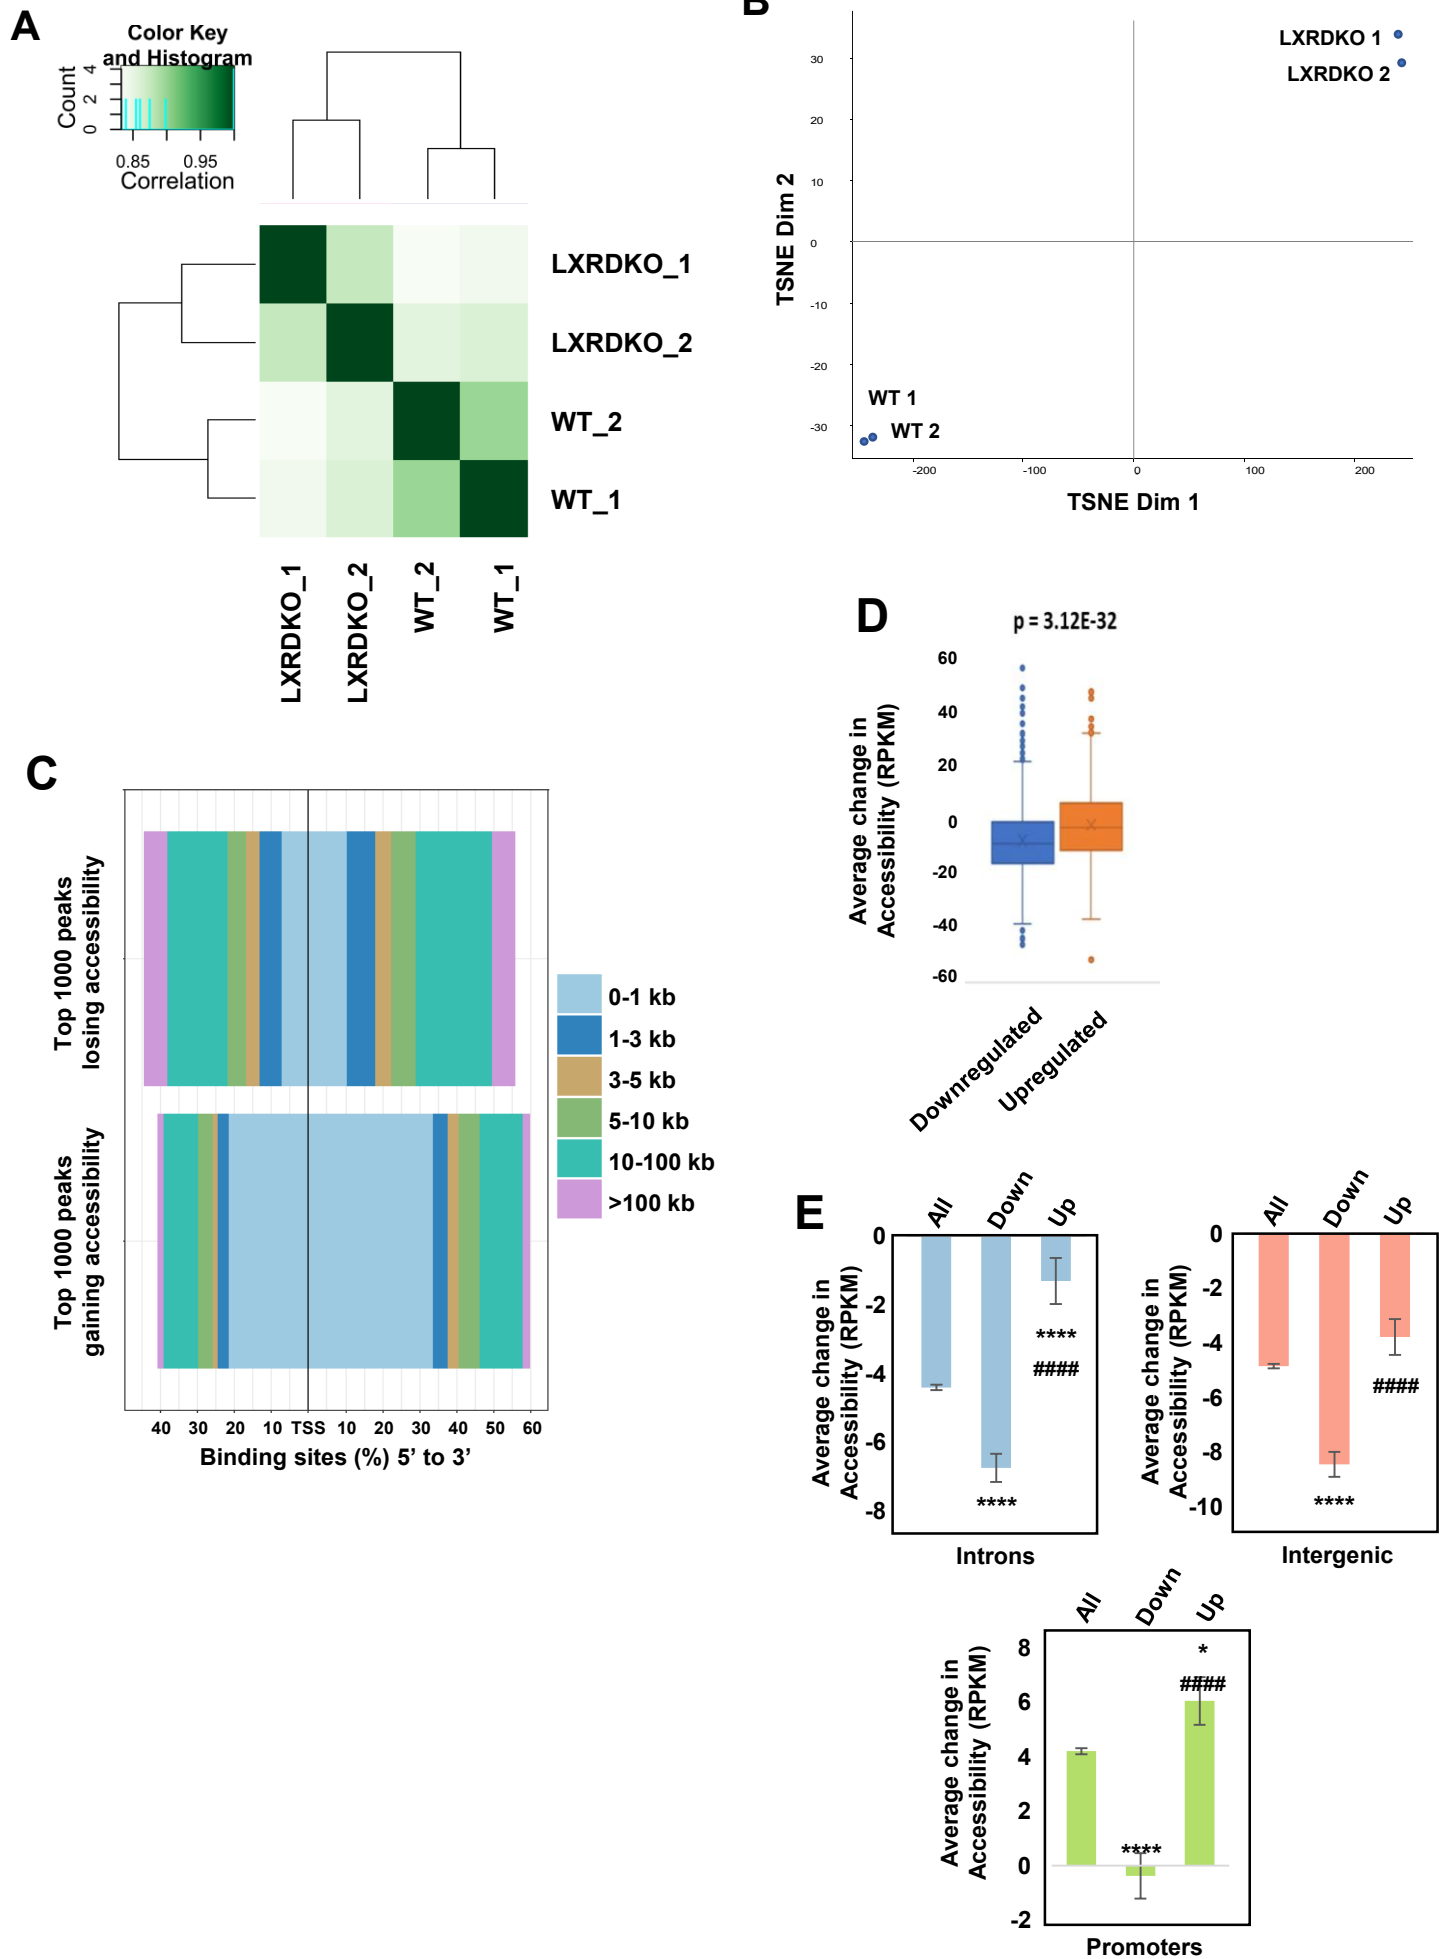

Figure S3

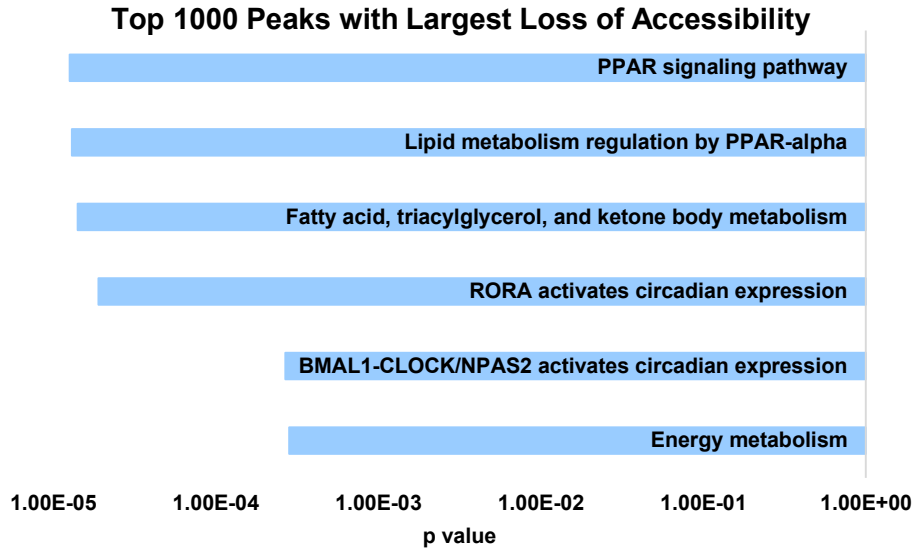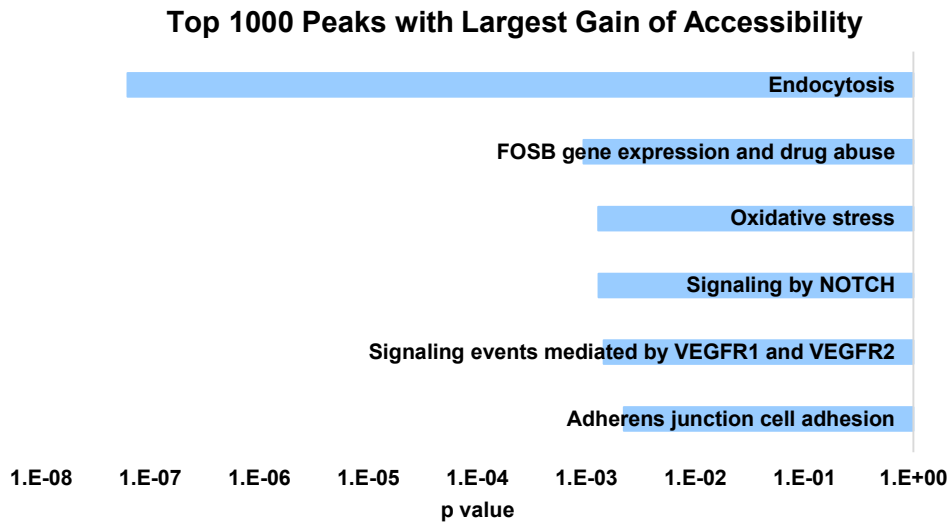

Figure S4

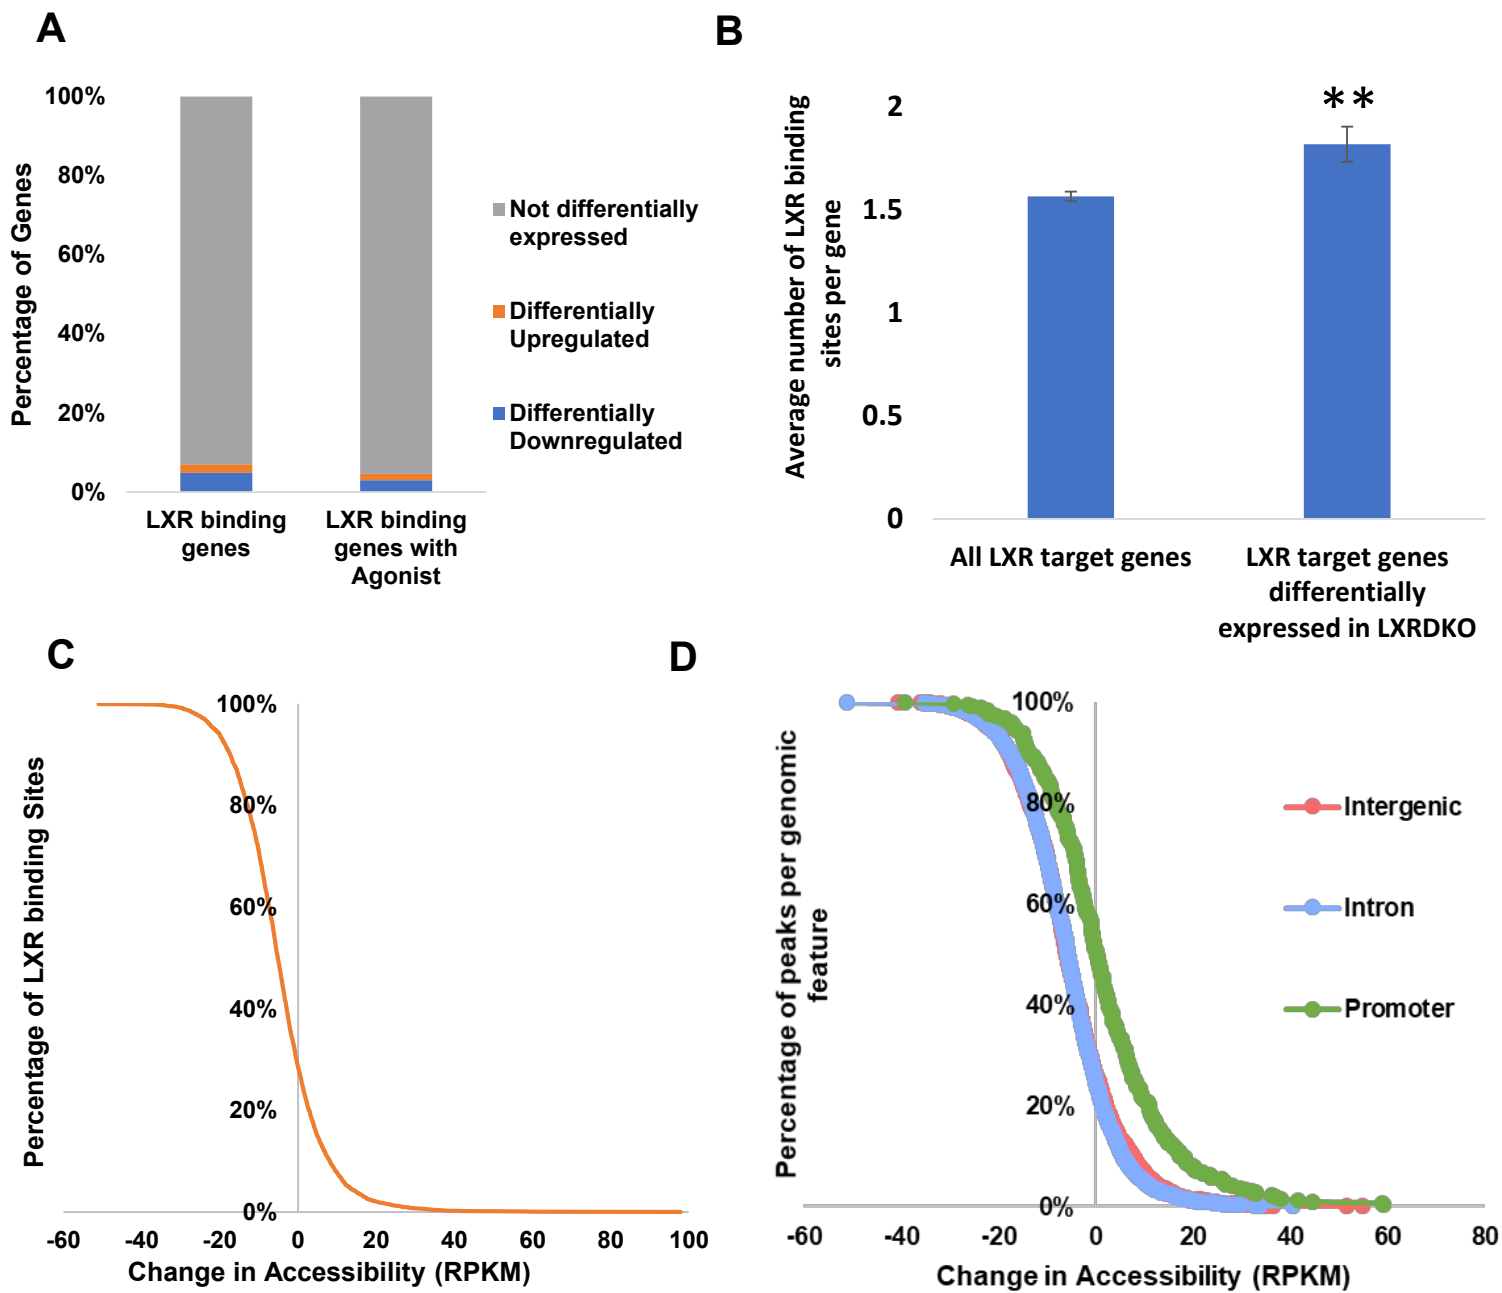

Figure S5

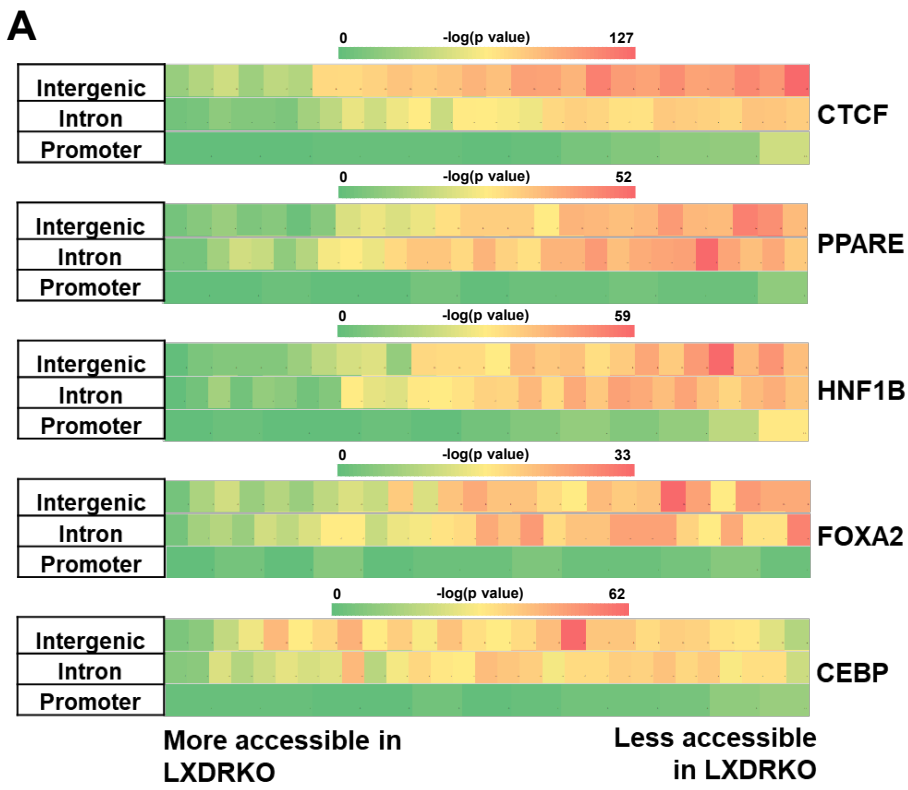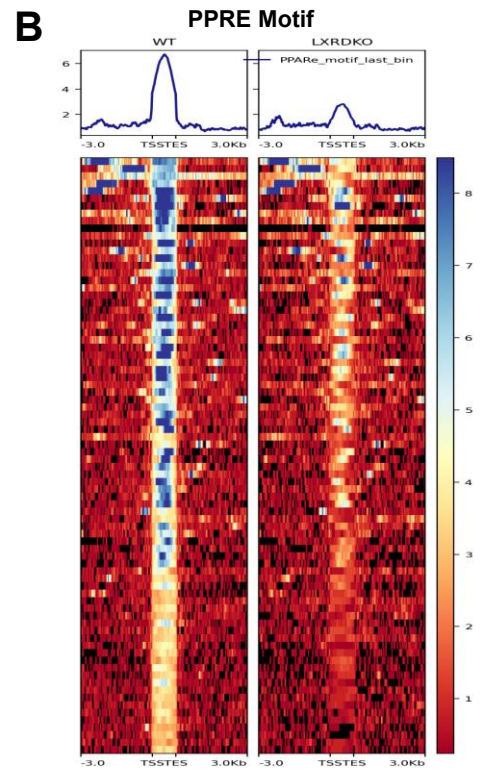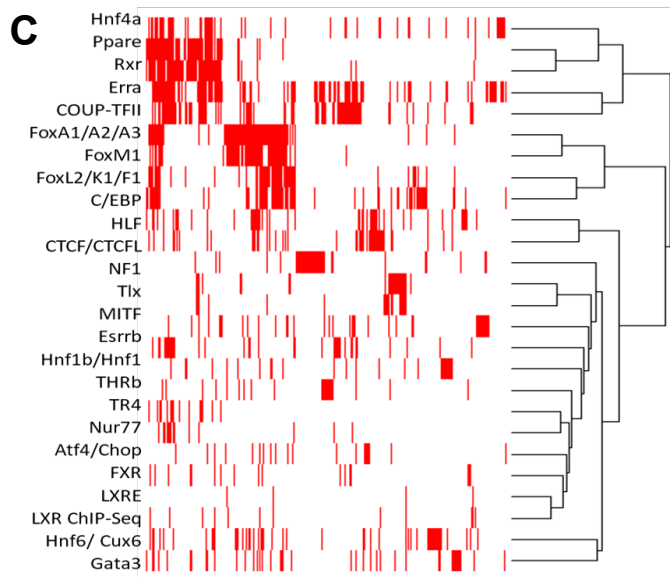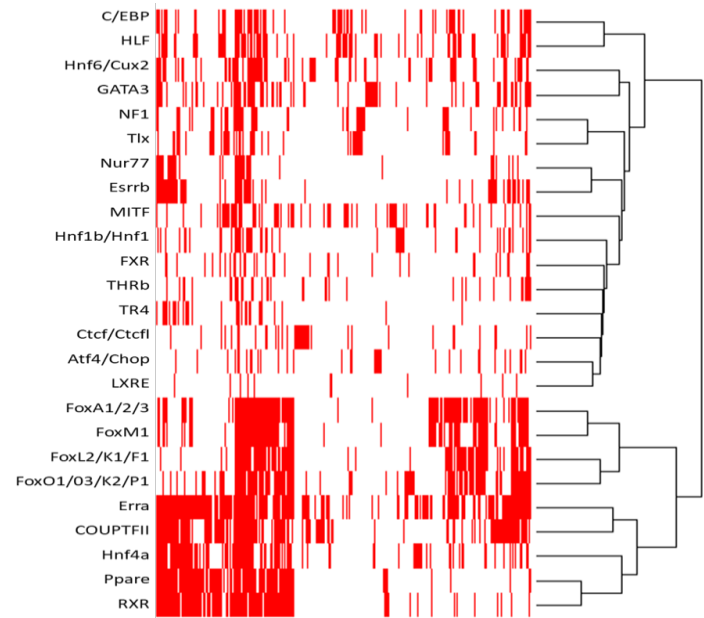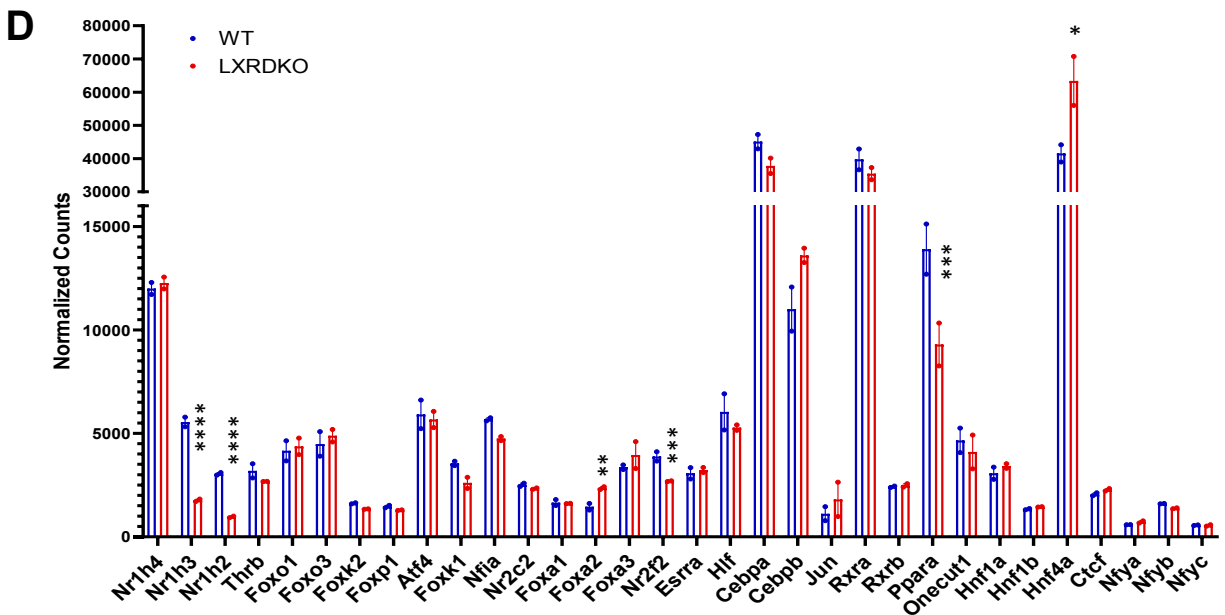

Figure S6



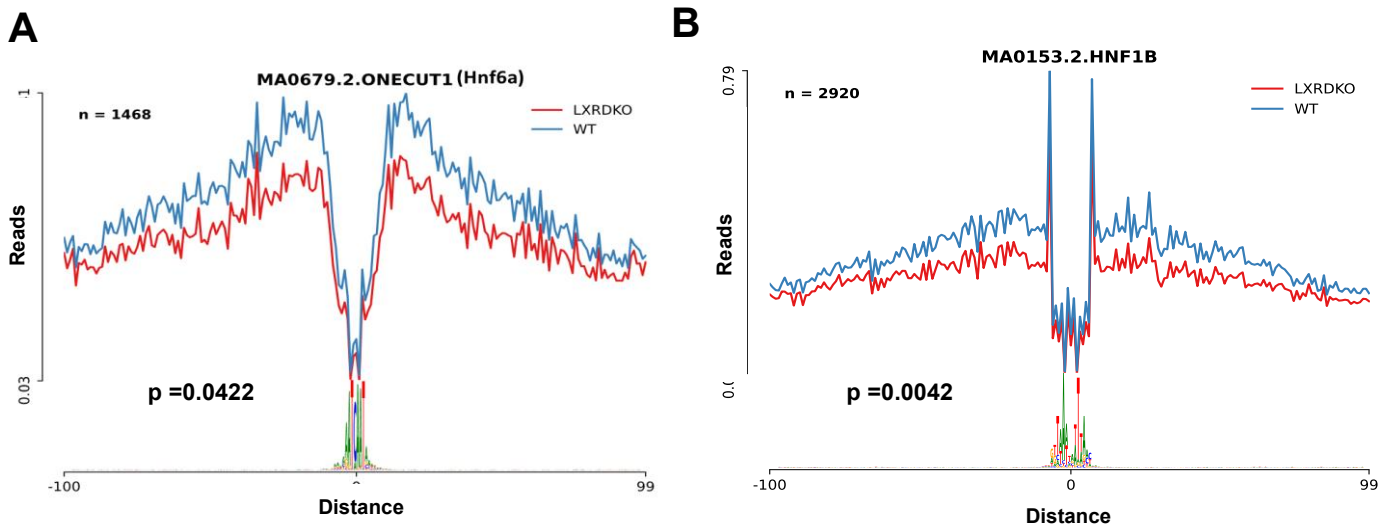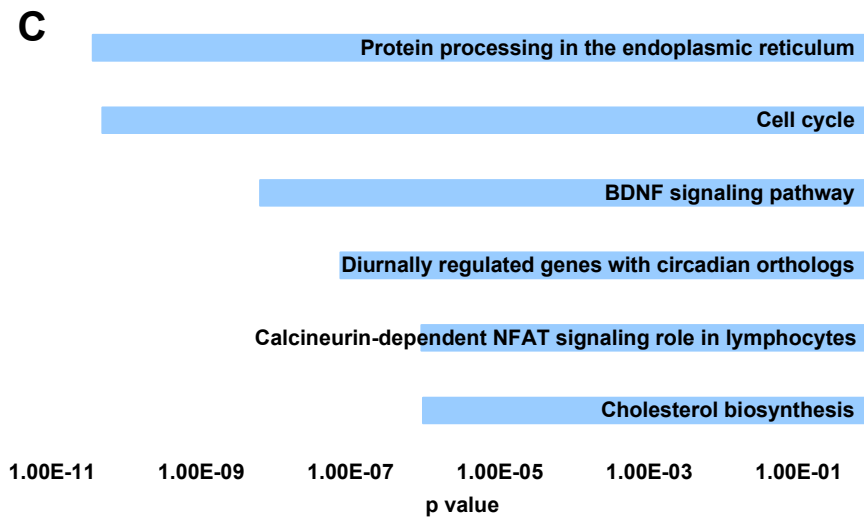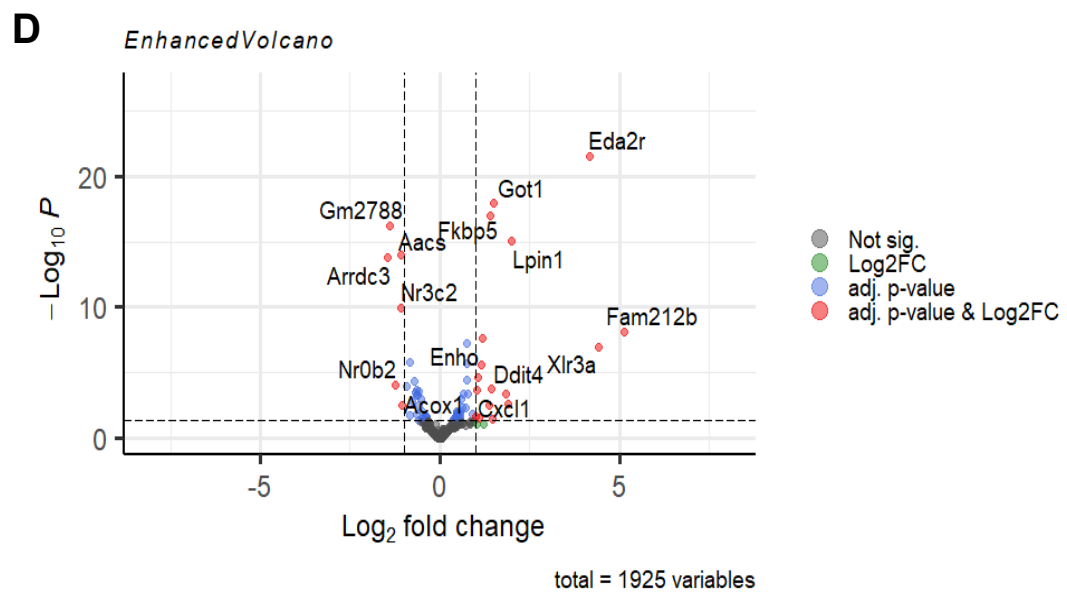

Figure S7

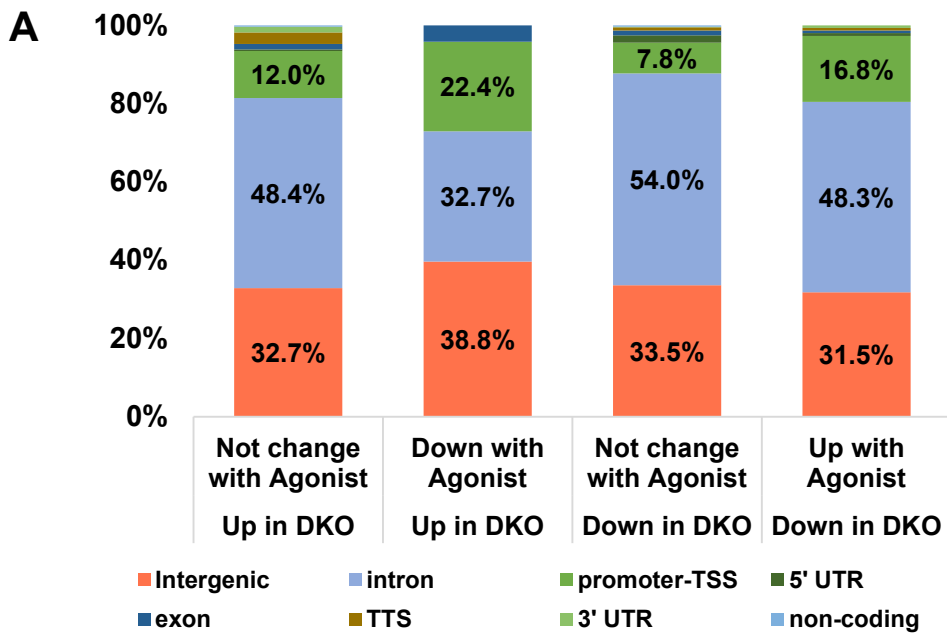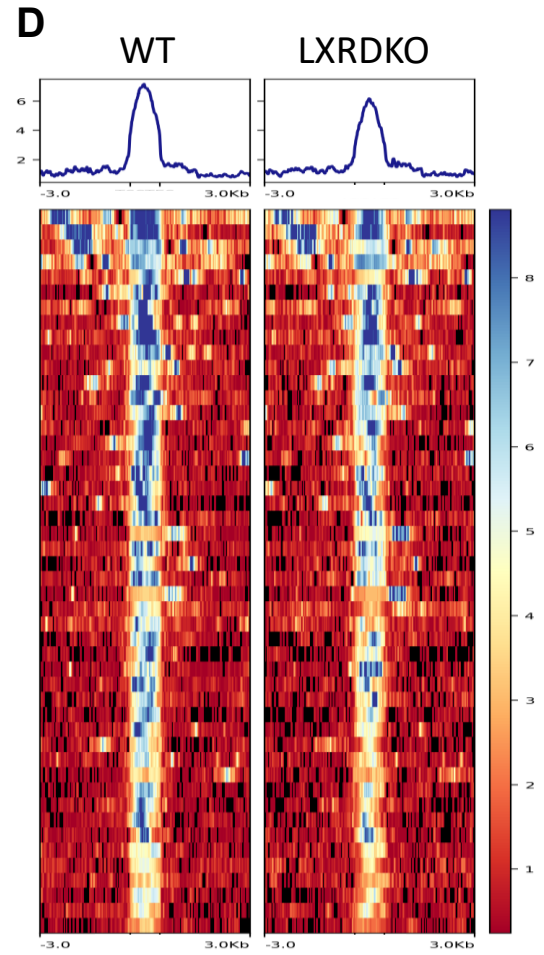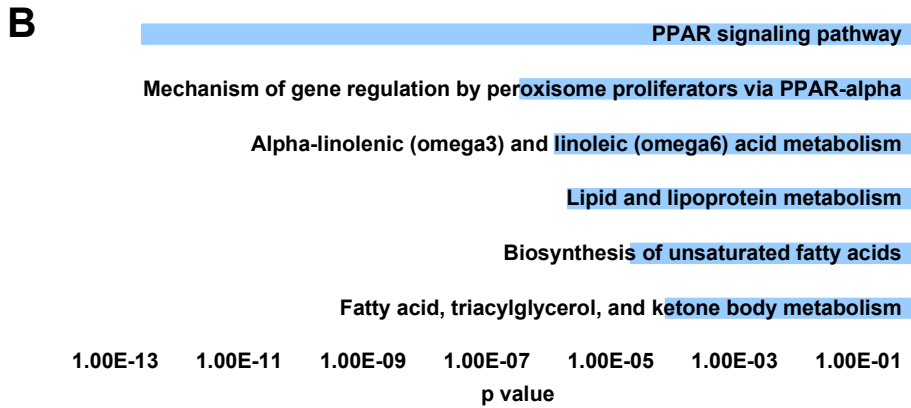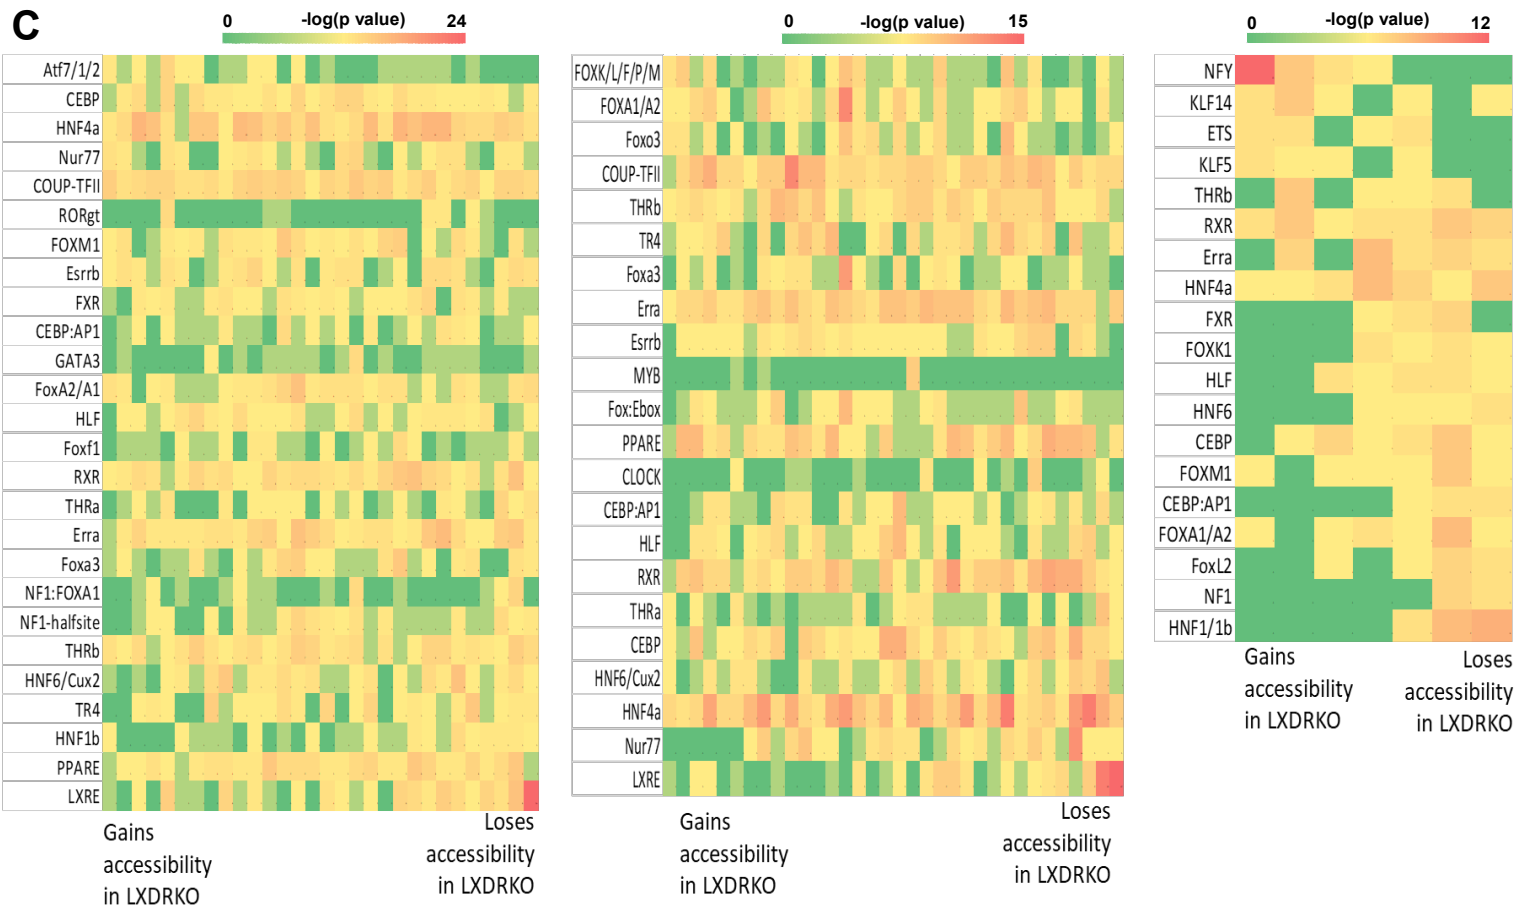

Figure S8

Supplemental Table 1. PCR Primers used

| Primer name (m f | Sequence                |
|------------------|-------------------------|
| mLpin1_F         | CATGCTTCGGAAAGTCCTTCA   |
| mLpin1_R         | GGTTATTCTTTGGCGTCAACCT  |
| mCxcl1_F         | CTGGGATTCACCTCAAGAACATC |
| mCxcl1_R         | CAGGGTCAAGGCAAGCCTC     |
| mSaa4_F          | CTCTGTTCTTTGTTCTGGGAG   |
| mSaa4_R          | CTAGGTTGTCCCGATAGGCTC   |
| mSlc25a15_F      | GCTGCCTCAAGACCTACTCC    |
| mSlc25a15_R      | CCGTAACACATGAACAGCACC   |
| mSorbs3_F        | TTCAGCTTCGTCTTTGAACAACA |
| mSorbs3_R        | CTTGGGTCAAGGTTGGAGGA    |
| mNnmt_F          | TGTGCAGAAAACGAGATCCTC   |
| mNnmt_R          | AGTTCTCCTTTTACAGCACCCA  |
| mCdkn1a_F        | CCTGGTGATGTCCGACCTG     |
| mCdkn1a_R        | CCATGAGCGCATCGCAATC     |
| mTbc1d8_F        | AGCCTAGCCAGATCACAAAGA   |
| mTbc1d8_R        | CGTCCAGAGGGAACAGTCT     |
| mTymp_F          | CGCGGTGATAGATGGAAGAGC   |
| mTymp_R          | CACACCTCCTGTGGAGTGTT    |
| mGot1_F          | GCGCCTCCATCAGTCTTTG     |
| mGot1_R          | ATTCATCTGTGCGGTACGCTC   |
| mEtnppl_F        | GCTCTCCGTTTGCTACTTCAC   |
| mEtnppl_R        | CCCTCTTGACATCTTTGCCCTT  |
| mI1r1_F          | CGAACCGTGAACAACACAAA    |
| mI1r1_R          | CAGAGGCACCATGAGACAAA    |
| mLurap1l_F       | TCTCTGGGTCTCTCGGTATAA   |
| mLurap1l_R       | TCCACAGCCAGCAAGATTAG    |
| mRetreg1_F       | GCCATCAAAGACCAGCTAGAA   |
| mRetreg1_R       | GTCCCAGCTCACTCTCAATTT   |
